# Supplementary material for: Polycomb protein Bmi1 promotes odontoblast differentiation by accelerating Wnt and BMP signaling pathways
Source: Research Square preprint supplement (doi:10.21203/rs.3.rs-4904329/v1), 2024-09-10
Supplement: Supplementary file 1 [file 7fc6a529942617e83de76a21.docx]

Target mRNA Forward primer Reverse primer

**Appendix table 1. List of oligonucleotides used for quantitative real-time PCR**

5’-TCAGTTCTGTTCTTGGGGTACAT-3’

5’-TGCCTGGCTCTTCTTACTGAG-3’

5’-CAGATCTCTAGCAGGTTGCTCTG-3’

5’-TTTTCAGTGTCTGCCGTGAG-3’

5’-CGTCATCCATGGCGAACT-3’

5’-GCACAACATCAAGGACATCG-3’

5’-CGTACCCAGGCGTATTTCAG-3’

5’-CTGCACCCCCAGAAAAAG-3’

5’-GGACATTACTGACCGCTCCT-3’

5’-CCCGCGAGTACAACCTTCT-3’

*TNALP*

*Runx2*

*Osterix*

*Osteocalcin*

*-actin*
